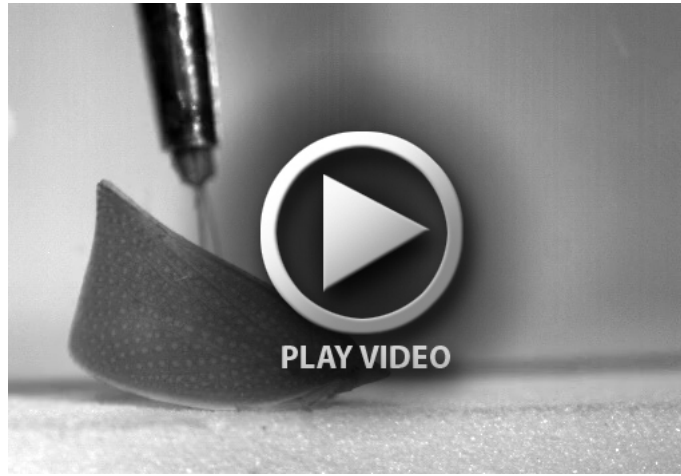

**Movie 1. A jump by *Siphanta acuta* captured at 5000 frames s<sup>-1</sup> and replayed at 10 frames s<sup>-1</sup>. The insect is viewed from the side as it jumped from the floor of the experimental chamber. See also Fig. 6.**

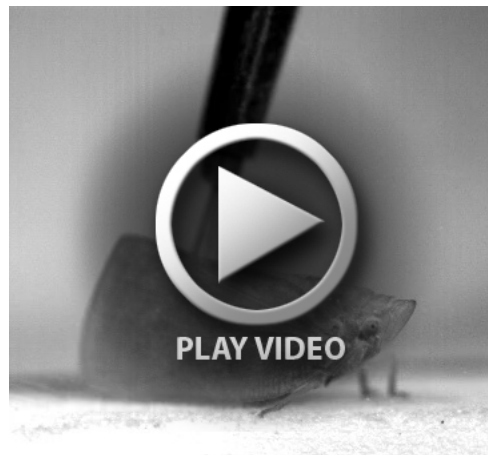

**Movie 2. A jump by *Colgar peracutum* captured at 5000 frames s<sup>-1</sup> and replayed at 10 frames s<sup>-1</sup>. The insect is viewed from the side as it jumped from the floor of the experimental chamber.**

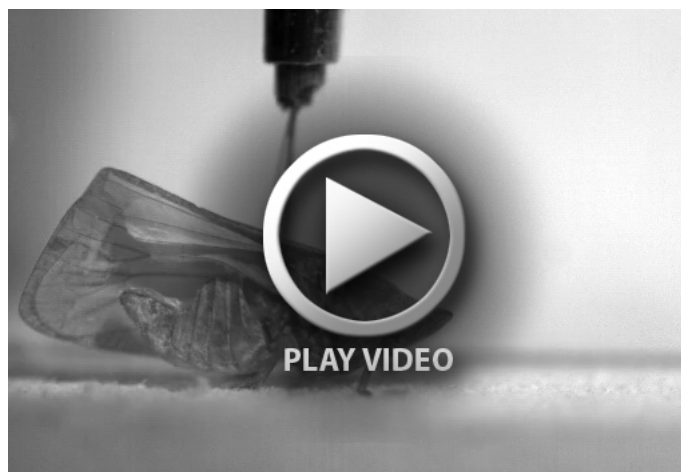

**Movie 3. A side view of a jump by *Colgar peracutum* captured at 5000 frames s<sup>-1</sup> and replayed at 10 frames s<sup>-1</sup> as it jumped from the floor of the experimental chamber. The right front wing was removed. See Fig. 7.**

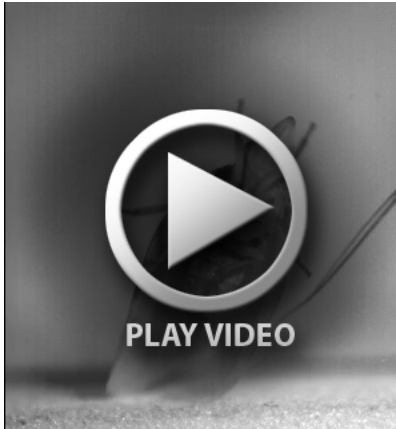

**Movie 4. A ventral view of a jump by *Colgar peracutum* captured at 5000 frames s<sup>-1</sup> and replayed at 10 frames s<sup>-1</sup> as it jumped from the front glass wall of the experimental chamber. See also Fig. 8.**
